# Supplementary material for: Electron-rich graphite-like electrode: stability vs. voltage for Al batteries
Source: Royal Society of Chemistry journal article supplement (doi:10.1039/c8ta01820k), 2018-01-01

## Supporting Information

### Electron-Rich Graphite-Like Electrode: Stability vs. Voltage for Al Battery

Preeti Bhauriyal,<sup>†</sup> Priyanka Garg,<sup>†</sup> Mahendra Patel,<sup>†</sup> Biswarup Pathak,<sup>†,\*,#</sup>

<sup>†</sup>Discipline of Chemistry and <sup>#</sup>Discipline of Metallurgy Engineering and Materials Science,  
Indian Institute of Technology (IIT) Indore, Indore. M.P. 453552, India

\*Email: [biswarup@iiti.ac.in](mailto:biswarup@iiti.ac.in)

**Figure S1:** Molecular dynamics simulation analysis of C<sub>3</sub>N phases at 300 K temperature as a function of time step, and the top and side view of the obtained structures for (a) 3D C<sub>3</sub>N bulk, (b) 2D C<sub>3</sub>N bilayer, and (c) 1D C<sub>3</sub>N-NT.

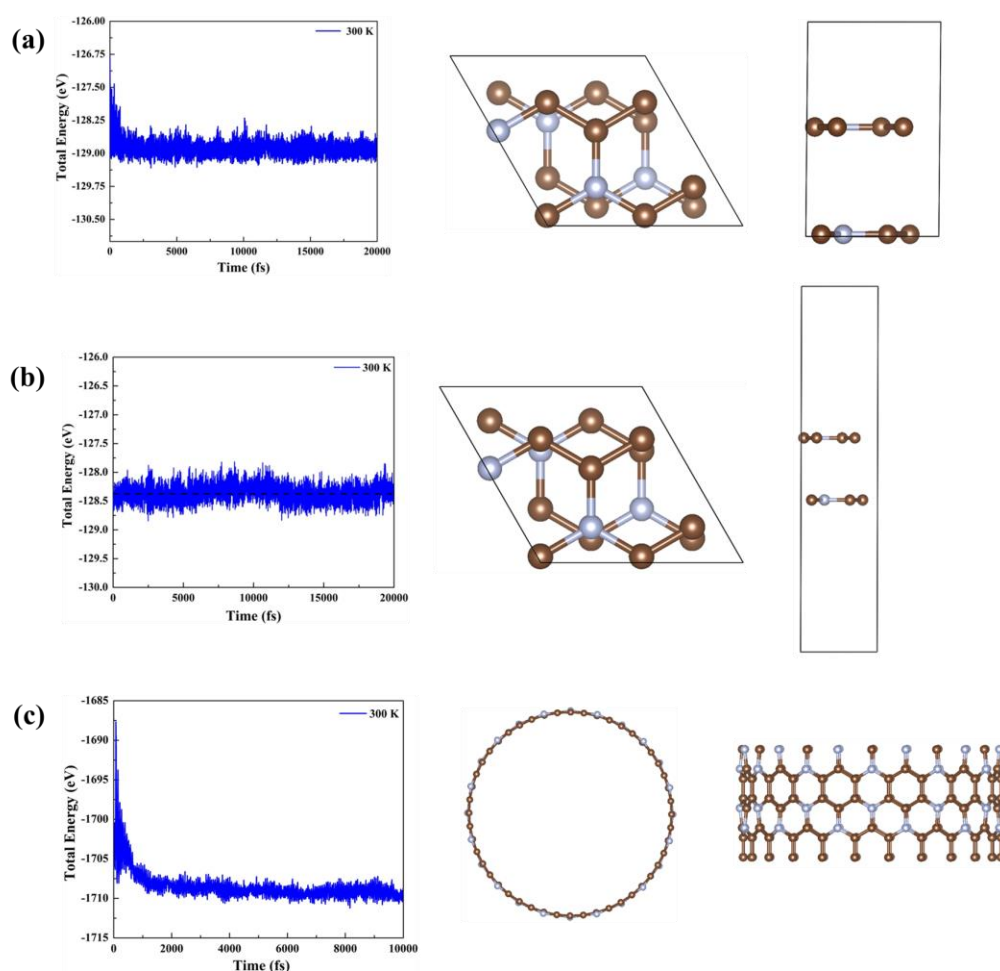

**Table S1:** Relative energy difference ( $\Delta E$ ) of stable binding sites in 3D C<sub>3</sub>N bulk, 2D C<sub>3</sub>N bilayer, and 1D C<sub>3</sub>N-NT.

| Sites            | $\Delta E$ (eV)          |                             |                          |                          |
|------------------|--------------------------|-----------------------------|--------------------------|--------------------------|
|                  | 3D C <sub>3</sub> N bulk | 2D C <sub>3</sub> N bilayer | 1D C <sub>3</sub> N-NT   |                          |
|                  |                          |                             | Inner surface adsorption | Outer surface adsorption |
| <b>H-NC</b>      | -                        | 0.003                       | 0.000                    | 0.035                    |
| <b>H-CC</b>      | -                        | 0.013                       | 0.051                    | 0.046                    |
| <b>B-NC</b>      | 0.140                    | 0.016                       | 0.008                    | 0.032                    |
| <b>B-CC</b>      | 0.012                    | 0.000                       | 0.020                    | 0.039                    |
| <b>T-NC/T-NN</b> | 0.000                    | -                           | 0.016                    | 0.000                    |
| <b>T-CC</b>      | 0.004                    | -                           | 0.013                    | 0.038                    |

**Figure S2:** Schematic picture of the structural change of  $C_3N$  bulk form AB to AA stacking on  $AlCl_4$  intercalation.

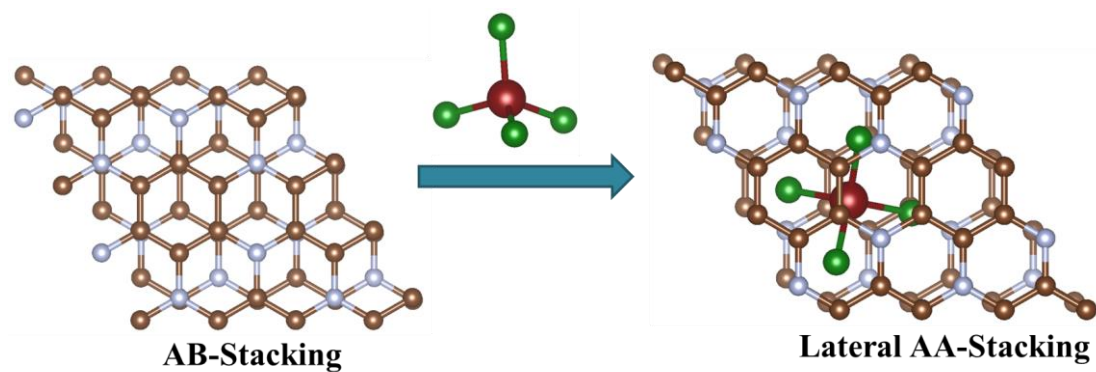

Figure S3: Schematic representation of  $\text{AlCl}_4$  binding in  $\text{C}_3\text{N}$  bilayer, (a) inside the bilayer, and (b) on the top of bilayer surface. R.E. is the relative energy difference (eV) between the two binding possibilities.

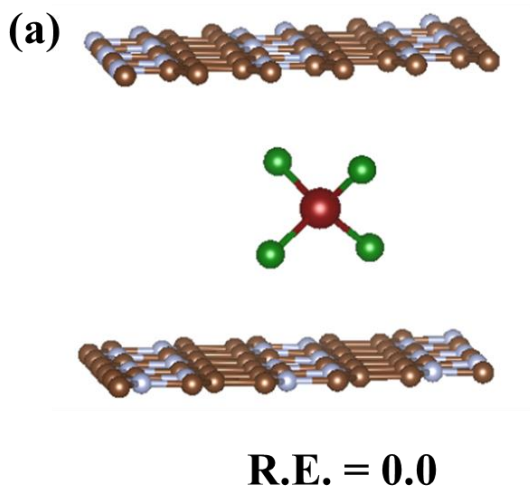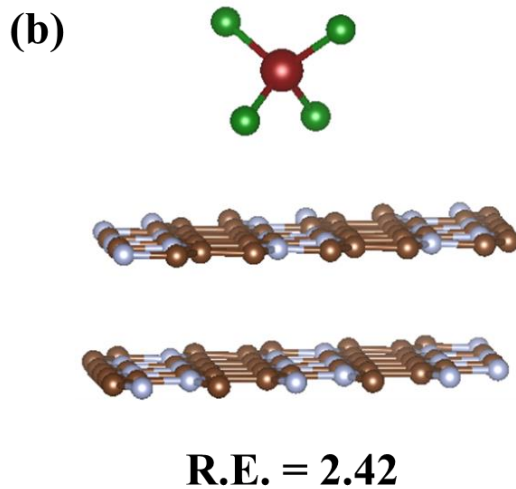

**Figure S4:** Total Charge density plots (Isosurface =  $0.25 \text{ e}/\text{\AA}^3$ ) and electron localization function plots of (001) section of one layer of (a) graphite, (b)  $\text{BC}_3$ , and (c)  $\text{C}_3\text{N}$ . The red and blue colours represent charge accumulation and depletion, respectively.

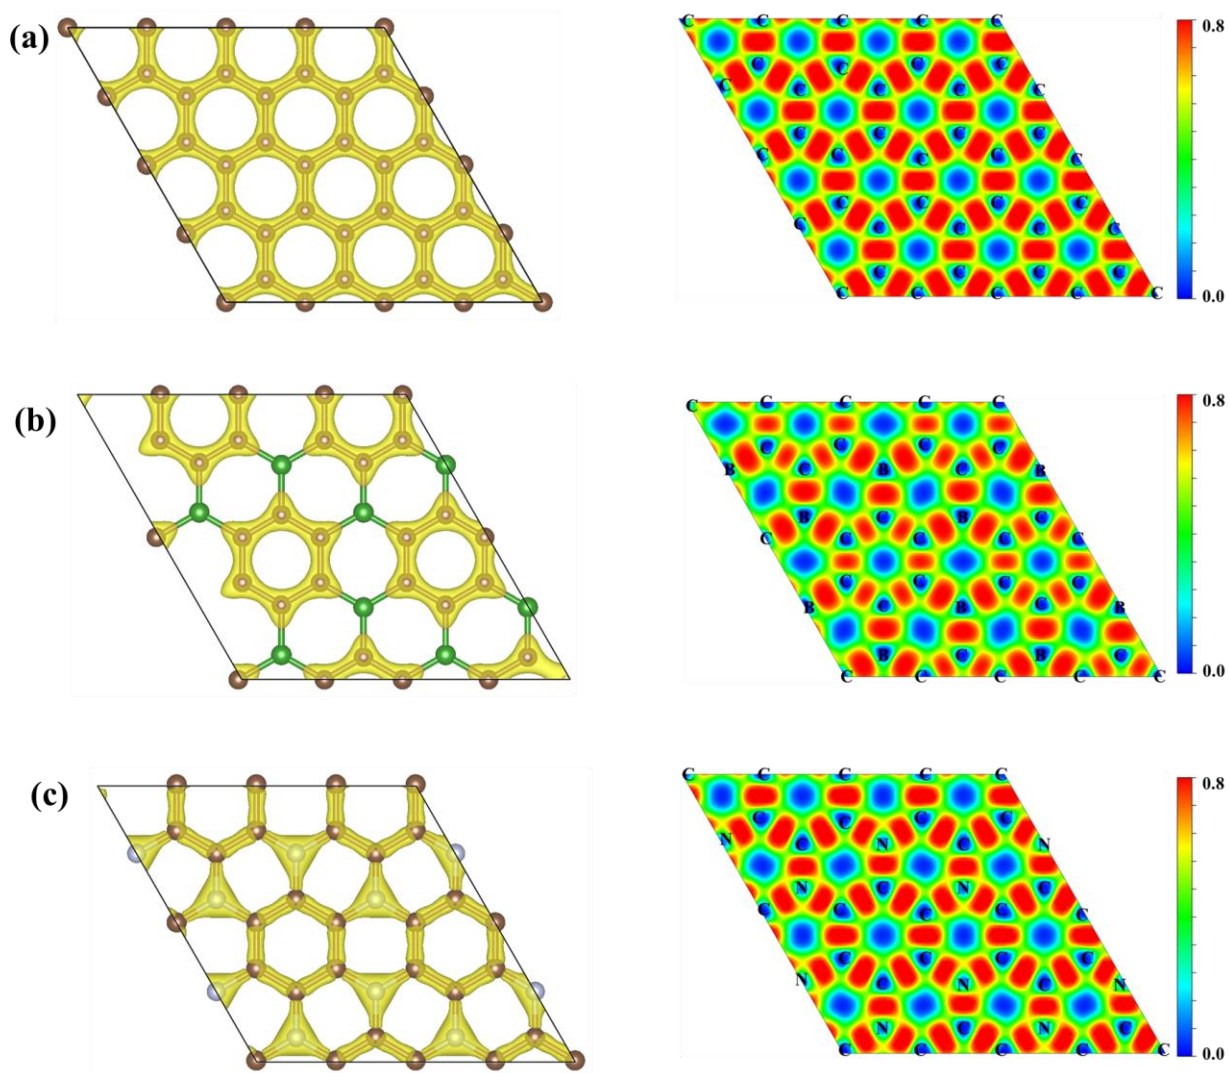

Supplement: c8ta01820k1.pdf [file c8ta01820k1.pdf]
